# Supplementary material
Source: PubMed Central journal article supplement (PMC4565792)
Supplement: NIHMS629289-supplement-Appendix.pdf [file NIHMS629289-supplement-Appendix.pdf]

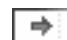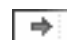

# Behçet Syndrome Manifestations and Activity in the United States versus Turkey – A Cross-sectional Cohort Comparison

## APPENDIX 1.

### Definitions of Organ Involvement in Behçet syndrome.

1. Oral ulcer – the presence of an oral ulcer not known to be infectious in origin
2. Genital ulcer – the presence of a genital ulcer not known to be infectious in origin
3. Skin disease – acneiform lesions, pustular skin disease, or nodular disease
4. Arthralgia – the presence of joint pain with or without arthritis on exam
5. Eye disease – uveitis or retinal vasculitis
6. Gastrointestinal disease – documented presence of a gastrointestinal ulcer on endoscopy. The usage of nonsteroidal antiinflammatory (NSAID) medications was not an exclusion to endoscopy; however, patients were asked to hold NSAID for a minimum of 4 weeks at the US National Institutes of Health and 3 months at the University of Istanbul
7. Neurologic disease – dural sinus thrombosis or white matter changes on radiographic studies in the setting of clinical neurologic symptoms other than headaches
8. Thrombosis – deep vein or arterial thrombosis on exam or radiographic studies
